# Supplementary material
Source: HighWire-hosted journal article supplement (https://svn.smart01.highwire.org/content/svn-2023-003004)
Supplement: inline-supplementary-material-1 [file inline-supplementary-material-1.pdf]

## Supplemental Tables

Supplemental Table 1. Characteristics of all enrolled Probands (n=51)

| Characteristics                                       |        | Sporadic CCM probands (n=8) | FCCM probands (n=33) | CCM probands unidentified the CCM type (n=10) | All multiple CCM probands (n=51) | <i>P-value*</i>  |
|-------------------------------------------------------|--------|-----------------------------|----------------------|-----------------------------------------------|----------------------------------|------------------|
| Age at enrollment, y                                  |        | 44.63 ± 14.08               | 38.97 ± 17.79        | 44.8 ± 11.24                                  | 41.00 ± 16.15                    | 0.409            |
| Age at diagnosis of probands, y                       |        | 42.85 ± 15.23               | 34.68 ± 17.87        | 39.42 ± 14.16                                 | 36.89 ± 16.82                    | 0.241            |
| Body mass index, kg/m <sup>2</sup>                    |        | 27.42 ± 3.16                | 23.16 ± 3.86         | 22.26 ± 3.57                                  | 23.65 ± 4.01                     | <b>0.006</b>     |
| Sex, No. (%)                                          | Male   | 5 (62.5)                    | 23 (69.7)            | 5 (50.0)                                      | 33 (64.7)                        | >0.999           |
|                                                       | Female | 3 (37.5)                    | 10 (30.3)            | 5 (50.0)                                      | 18 (35.3)                        |                  |
| Adult, No. (%)                                        | No     | 0                           | 7 (21.2)             | 0                                             | 7 (13.7)                         | 0.310            |
|                                                       | Yes    | 8 (100.0)                   | 26 (78.8)            | 10 (100.0)                                    | 44 (86.3)                        |                  |
| ICH, No. (%)                                          | No     | 2 (25.0)                    | 21 (63.6)            | 3 (30.0)                                      | 26 (51)                          | 0.109            |
|                                                       | Yes    | 6 (75.0)                    | 12 (36.4)            | 7 (70.0)                                      | 25 (49)                          |                  |
| Epilepsy, No. (%)                                     | No     | 7 (87.5)                    | 26 (78.8)            | 6 (60.0)                                      | 39 (76.5)                        | >0.999           |
|                                                       | Yes    | 1 (12.5)                    | 7 (21.2)             | 4 (40.0)                                      | 12 (23.5)                        |                  |
| FND without ICH, No. (%)                              | No     | 8 (100.0)                   | 31 (93.9)            | 10 (100.0)                                    | 49 (96.1)                        | >0.999           |
|                                                       | Yes    | 0                           | 2 (6.1)              | 0                                             | 2 (3.9)                          |                  |
| NSWI, No. (%)                                         | No     | 5 (62.5)                    | 25 (75.8)            | 9 (90.0)                                      | 39 (76.5)                        | 0.658            |
|                                                       | Yes    | 3 (37.5)                    | 8 (24.2)             | 1 (10.0)                                      | 12 (23.5)                        |                  |
| Number of lesions on the SWI sequence, No. (%)        | ≤5     | 7 (87.5)                    | 2 (6.9)              | 4 (40.0)                                      | 13 (27.7)                        | <b>&lt;0.001</b> |
|                                                       | 6~25   | 1 (12.5)                    | 8 (27.6)             | 3 (30.0)                                      | 12 (25.5)                        |                  |
|                                                       | >25    | 0                           | 19 (65.5)            | 3 (30.0)                                      | 22 (46.8)                        |                  |
| Number of lesions larger than 4mm on the T2 sequence, | <10    | 8 (100.0)                   | 17 (54.8)            | 9 (90.0)                                      | 34 (69.4)                        | <b>0.034</b>     |
|                                                       | ≥10    | 0                           | 14 (45.2)            | 1 (10.0)                                      | 15 (30.6)                        |                  |

---

No. (%)

---

\*P-values obtained by statistical tests in sporadic CCM patients and familial CCM patients. CCM, Cerebral cavernous vascular malformation. ICH, intracranial hemorrhage. FND, focal neurological deficits. NSWI, Non-specific symptoms without ICH.

Supplemental Table 2. Final diagnosis in patients with suspected CCM (n=15)

| ID | Number of lesions<br>observed on the SWI<br>sequence | Genetic variation | Genetic variation of<br>proband | The final diagnosis<br>of CCM |
|----|------------------------------------------------------|-------------------|---------------------------------|-------------------------------|
| 1  | ≤5                                                   | <i>CCM2</i>       | <i>CCM2</i>                     | Yes                           |
| 2  | 6~25                                                 | <i>CCM2</i>       | <i>CCM2</i>                     | Yes                           |
| 3  | ≤5                                                   | No mutation       | <i>CCM1</i>                     | No                            |
| 4  | ≤5                                                   | <i>CCM2</i>       | <i>CCM2</i>                     | Yes                           |
| 5  | ≤5                                                   | <i>CCM1</i>       | <i>CCM1</i>                     | Yes                           |
| 6  | ≤5                                                   | No mutation       | <i>CCM1</i>                     | No                            |
| 7  | ≤5                                                   | <i>CCM1</i>       | <i>CCM1</i>                     | Yes                           |
| 8  | ≤5                                                   | <i>CCM1</i>       | <i>CCM1</i>                     | Yes                           |
| 9  | ≤5                                                   | No mutation       | <i>CCM1</i>                     | No                            |
| 10 | ≤5                                                   | No mutation       | <i>CCM1</i>                     | No                            |
| 11 | ≤5                                                   | No mutation       | No mutation                     | Suspected                     |
| 12 | ≤5                                                   | No mutation       | <i>CCM1</i>                     | No                            |
| 13 | 6~25                                                 | No mutation       | No mutation                     | Suspected                     |
| 14 | 1                                                    | No mutation       | No mutation                     | Suspected                     |
| 15 | 6~25                                                 | No mutation       | No mutation                     | Suspected                     |

CCM, Cerebral cavernous vascular malformation.

Supplementary Table 3. Genetic mutations in 3 classical CCM gene

| Single nucleotide variants |              |                        |                       |                   |                               |           |              |                  |       |
|----------------------------|--------------|------------------------|-----------------------|-------------------|-------------------------------|-----------|--------------|------------------|-------|
| Gene                       | Rs number    | Variant Conseq         | Nucleotide alteration | Amino acid change | chromosomal location (GRch37) | Phenotype | Clinvar      | Number of family | Novel |
| <i>CCM1</i>                | rs2131525596 | deletion               | c.1141del             | Asp381Ilefs*4     | chr7: 91855843-91855846       | CCM       | Pathogenic   | 1                | N     |
| <i>CCM1</i>                | rs1563267100 | Insertion and Deletion | c.1255-1_1256del      | --                | chr7:91852291-91852293        | CCM       | Pathogenic   | 1                | N     |
| <i>CCM1</i>                | rs1563267100 | splice Region          | c.1255-1G>T           | --                | chr7:91852293                 | CCM       | Pathogenic   | 1                | N     |
| <i>CCM1</i>                |              | duplication            | c.1507dup             | Thr503Arg fs*17   | chr7:91851271                 |           | Not Reported | 1                | Y     |
| <i>CCM1</i>                | rs2131435199 | nonsense               | c.1561C>T             | Gln521*           | chr7:91851218                 | CCM       | Pathogenic   | 1                | N     |
| <i>CCM1</i>                |              | deletion               | c.1654del             | Ile552*           | chr7:91844001                 | --        | Not Reported | 1                | Y     |
| <i>CCM1</i>                | rs1490051866 | duplication            | c.1933_1936dup        | Thr646Ilefs*10    | chr7:91842597-91842598        | --        | Not Reported | 1                | Y     |
| <i>CCM1</i>                |              | duplication            | c.255dupT             | Ile86Tyrfs*35     | chr7:91870313                 | --        | Not Reported | 1                | Y     |
| <i>CCM1</i>                | rs137853139  | missense               | c.410A>G              | Asp137Gly         | chr7:91865802                 | CCM       | Pathogenic   | 1                | N     |
| <i>CCM1</i>                | rs1563305064 | splice Region          | c.729+1G>C            | --                | chr7:91864716                 | CCM       | Pathogenic   | 1                | N     |
| <i>CCM1</i>                | rs886039659  | nonsense               | c.802C>T              | Gln268*           | chr7:91864165                 | --        | Pathogenic   | 1                | N     |
| <i>CCM1</i>                | --           | deletion               | c.803del              | Gln268Argfs*8     | chr7:91864164                 | --        | Not Reported | 1                | Y     |
| <i>CCM1</i>                | --           | nonsense               | c.981T>G              | Tyr327*           | chr7:91863771                 | --        | Not Reported | 1                | Y     |
| <i>CCM2</i>                | --           | nonsense               | c.475C>T              | Gln159*           | chr7:45108044                 | --        | Not Reported | 1                | N     |
| <i>CCM2</i>                | --           | deletion               | c.502_503del          | Leu169Valfs*66    | chr7:45108069-45108070        | --        | Not Reported | 1                | N     |
| <i>CCM2</i>                | rs755800734  | nonsense               | c.55C>T               | Arg19*            | chr7:45077876                 | CCM       | Pathogenic   | 4                | N     |
| <i>CCM2</i>                | --           | deletion               | ex.2del               | --                | chr7: 45067212-45078045       | --        | Not Reported | 1                | Y     |
| <i>CCM3</i>                | --           | deletion               | c.558_567del          | Lys186fs          | chr3:167402168                | --        | Not Reported | 1                | Y     |
| <i>CCM3</i>                | --           | deletion               | c.373del              | Val125*           | chr3:167413406                | --        | Not Reported | 1                | Y     |

| <i>CCM3</i>                   | --                                            | delins              | c.491_493delins<br>GG                                   | Lys164Argfs*5              | chr3:167405086-<br>167405088                                                                         | --            | Not Reported | 1                   | Y     |
|-------------------------------|-----------------------------------------------|---------------------|---------------------------------------------------------|----------------------------|------------------------------------------------------------------------------------------------------|---------------|--------------|---------------------|-------|
| <b>Copy number variations</b> |                                               |                     |                                                         |                            |                                                                                                      |               |              |                     |       |
| <i>Gene</i>                   | Description                                   | Variant Conseq      | Performance                                             | Copy number<br>loss region | chromosomal location<br>(GRch37)                                                                     | Phenot<br>ype | Clinvar      | Number<br>of family | Novel |
| <i>CCMI</i>                   | A deletion of<br>7.96Mb (copy<br>number =1)   | Copy number<br>loss | contains 77<br>genes, 48 of<br>which encode<br>proteins | 7q21.11q21.3               | chr7:g.86273209-<br>94232784del                                                                      | CCM           | Pathogenic   | 1                   | N     |
| <i>CCMI</i>                   | Heterozygous<br>deletion of the<br>whole gene | Copy number<br>loss | exons 1-4 are not<br>encoded                            | 7q21.2                     | chr7:91875220-91875414<br>chr7:91874741-91874909<br>chr7:91874216-91874485<br>chr7:91873316-91873463 | CCM           | Pathogenic   | 1                   | N     |

Novel, novel mutation. Y, yes. N, no. CCM, Cerebral cavernous malformation.

Supplementary Table 4. Comparison of characteristics, symptoms and number of lesions in FCCM patients with different genotypes (n=64)

| Characteristics                                                   |        | Unknow mutation<br>(n=19) | <i>CCM1</i><br>(n=24) | <i>CCM2</i><br>(n=17) | <i>CCM3</i><br>(n=4) | <i>P value</i> |
|-------------------------------------------------------------------|--------|---------------------------|-----------------------|-----------------------|----------------------|----------------|
| Age at enrollment, y                                              |        | 41.74 ± 20.87             | 37.42 ± 16.10         | 34.76 ± 18.94         | 32.75 ± 15.84        | 0.651          |
| Age at diagnosis of probands, y                                   |        | 41.23 ± 21.15             | 33.18 ± 15.03         | 31.89 ± 19.44         | 28.56 ± 15.76        | 0.338          |
| Body mass index, kg/m <sup>2</sup>                                |        | 24.26 ± 4.91              | 23.25 ± 3.14          | 22.81 ± 4.76          | 20.56 ± 4.90         | 0.424          |
| Sex, No. (%)                                                      | Male   | 12 (63.2)                 | 14 (58.3)             | 10 (58.8)             | 1 (25.0)             | 0.612          |
|                                                                   | Female | 7 (36.8)                  | 10 (41.7)             | 7 (41.2)              | 3 (75.0)             |                |
| Adult, No. (%)                                                    | No     | 3 (15.8)                  | 6 (25.0)              | 4 (23.5)              | 1 (25.0)             | 0.909          |
|                                                                   | Yes    | 16 (84.2)                 | 18 (75.0)             | 13 (76.5)             | 3 (75.0)             |                |
| Diagnosed by the appearance of symptoms, No. (%)                  | No     | 14 (73.7)                 | 9 (37.5)              | 10 (58.8)             | 1 (25.0)             | 0.063          |
|                                                                   | Yes    | 5 (26.3)                  | 15 (62.5)             | 7 (41.2)              | 3 (75.0)             |                |
| Number of lesions on the SWI sequence, No. (%) <sup>a</sup>       | ≤5     | 4 (23.5)                  | 4 (17.4)              | 4 (23.5)              | 0                    | 0.525          |
|                                                                   | 6~25   | 5 (29.4)                  | 6 (26.1)              | 3 (17.6)              | 0                    |                |
|                                                                   | >25    | 6 (35.3)                  | 13 (56.5)             | 9 (52.9)              | 2 (66.7)             |                |
| Number of lesions larger than 4mm on the T2 sequence <sup>b</sup> | 1      | 2 (11.8)                  | 0                     | 1 (5.9)               | 1 (33.3)             | <b>0.041</b>   |
|                                                                   | <10    | 11 (73.3)                 | 17 (70.8)             | 12 (75.0)             | 0                    |                |
|                                                                   |        | ≥10                       | 4 (26.7)              | 7 (29.2)              | 4 (100.0)            |                |

Note: a Four patients with FCCM did not receive SWI sequence examination due to their young age or metal stents, which were not suitable for enhanced MRI examination; b Five patients with FCCM did not receive T2WI sequence examination due to their young age or metal stents, which were not suitable for enhanced MRI examination. CCM, Cerebral cavernous malformation.

## Supplementary Figures

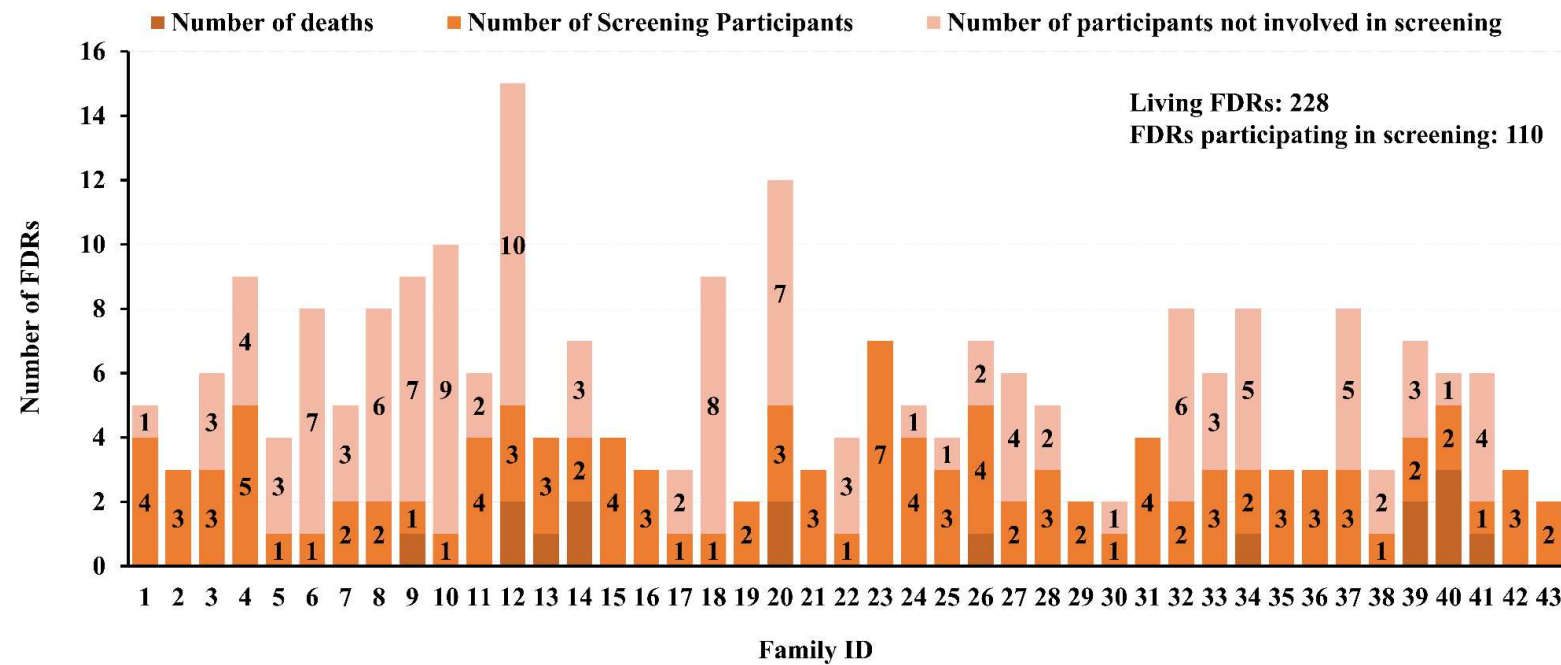

Supplementary Figure 1. The number of members of each family and the number of members enrolled in the study. FDRs, First degree relatives.

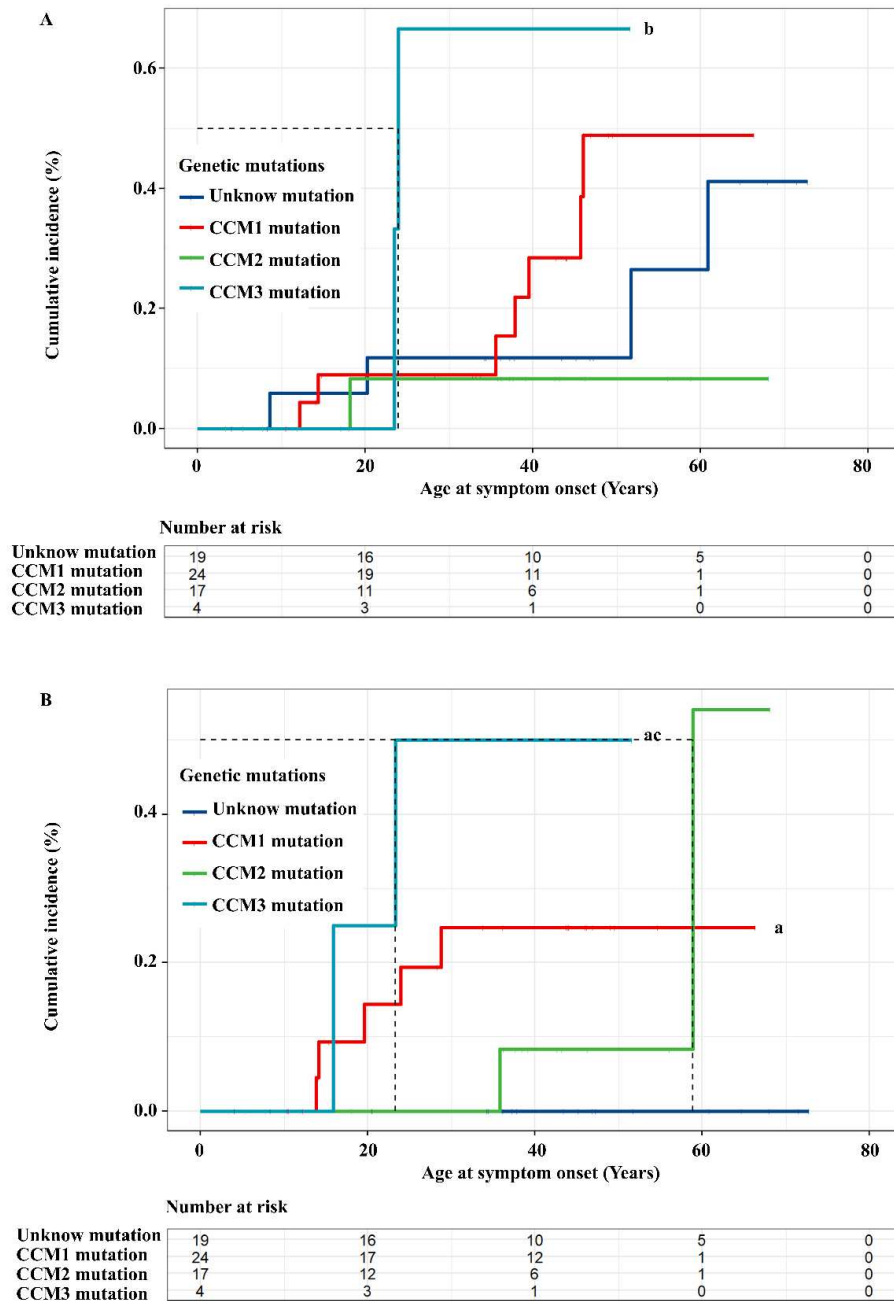

Supplementary Figure 2. Cumulative incidence in FCCM patients with different genotypes. A. Cumulative intracranial hemorrhage in FCCM patients with different genotypes; B. Cumulative epilepsy in FCCM patients with different genotypes.
